1 **Deep Learning Shows Cellular Senescence Is a Barrier to Cancer**

2 **Development**

3

4 Indra Heckenbach<sup>1,2</sup>, Michael Ben Ezra<sup>1,3</sup>, Garik V Mkrtchyan<sup>1</sup>, Jakob

5 Sture Madsen<sup>1</sup>, Malte Hasle Nielsen<sup>4</sup>, Denise Oró<sup>4</sup>, Laust Mortensen<sup>3,5</sup>,

6 Eric Verdin<sup>2</sup>, Rudi Westendorp<sup>3,5</sup>, Morten Scheibye-Knudsen<sup>1,\*</sup>

7

8 <sup>1</sup>Center for Healthy Aging, Department of Cellular and Molecular Medicine,

9 University of Copenhagen, Copenhagen, Denmark

10 <sup>2</sup>Buck Institute for Research on Aging, Novato, CA, USA

11 <sup>3</sup>Methods and Analysis, Statistics Denmark, Copenhagen, Denmark

12 <sup>4</sup>Gubra, Hørsholm, Denmark

13 <sup>5</sup>Department of Public Health, University of Copenhagen, Copenhagen, Denmark

14 \* Correspondence: [mscheibye@sund.ku.dk](mailto:mscheibye@sund.ku.dk)

15

16

17

18 **Abstract**

19

20 Cellular senescence is a critical component of aging and many age-related diseases, but  
21 understanding its role in human health is challenging in part due to the lack of exclusive or  
22 universal markers. Using neural networks, we achieve high accuracy in predicting senescence  
23 state and type from the nuclear morphology of DAPI-stained human fibroblasts, murine  
24 astrocytes and fibroblasts derived from premature aging diseases *in vitro*. After generalizing this  
25 approach, the predictor recognizes an increasing rate of senescent cells with age in H&E-  
26 stained murine liver tissue and human dermal biopsies. Evaluating corresponding medical  
27 records reveals that individuals with increased senescent cells have a significantly decreased  
28 rate of malignant neoplasms, lending support for the protective role of senescence in limiting  
29 cancer development. In sum, we introduce a novel predictor of cellular senescence and apply it  
30 to diagnostic medical images, indicating cancer occurs more frequently for those with a lower  
31 rate of senescence.

32

33

## 34 **Introduction**

35

36 Cellular senescence is widely recognized as a fundamental process in aging, both as a primary  
37 causal factor in the decline of tissue homeostasis and as a consequence of other aging  
38 processes such as inflammation and DNA damage<sup>1-3</sup>. Due to its critical role in disease etiology,  
39 senescence is increasingly recognized as a target for pharmaceutical intervention<sup>4</sup>. It also  
40 serves as a biomarker for aging<sup>5</sup>, possibly providing a more nuanced measure of age-related  
41 health in model organisms beyond simple chronological age. However, the role of senescence  
42 in human health is not clearly understood. Senescent cells present a complex and diverse  
43 phenotype, which varies significantly by cell type and source<sup>6,7</sup>. There is considerable overlap  
44 between molecular factors that associate with senescence, DNA damage repair, inflammation,  
45 and other processes<sup>8</sup>. Some of the most common markers of senescence are beta-  
46 galactosidase, produced by increased expression from lysosome activity, and the cell cycle  
47 inhibitors p16 and p21. Nevertheless, there is no single marker that reliably and consistently  
48 identifies senescence<sup>9-11</sup>. Importantly, senescent cells often exhibit an altered morphology,  
49 including expanded nuclei and an irregular, flattened appearance<sup>12,13</sup>, making senescence  
50 amenable to analysis with computer vision and machine learning methods<sup>14</sup>.

51

52 We present deep learning models that can predict cellular senescence with high accuracy  
53 based on nuclear morphology. These methods can further distinguish between multiple types of  
54 senescence, including radiation-induced damage and replicative exhaustion. Notably, predicted  
55 senescence correlates substantially with DNA damage markers  $\gamma$ H2AX and 53BP1 foci counts.  
56 Our senescence predictor was developed using normal human fibroblast lines, but it also  
57 identifies increased senescence when applied to multiple types of premature aging diseases,  
58 including Hutchinson-Gilford progeria syndrome (HGPS), ataxia telangiectasia (AT), and

59 Cockayne syndrome (CS). We also evaluated the predictor on mouse astrocytes and found it  
60 indicated increased senescence in cells subjected to ionizing radiation, confirming its relevance  
61 to different cell types and organisms. These methods were applied to H&E-stained mouse liver  
62 tissue, where we found an increasing rate of senescence with age. Further, these methods  
63 were applied to H&E-stained human tissue sections and predict an age-dependent increase in  
64 senescence. Using the National Patient Register, which records all ambulatory and in-patient  
65 contacts with Danish hospitals, we investigated how predicted senescence relates to human  
66 disease. We found a highly statistically significant relationship between malignant neoplasm  
67 incidence and fewer predicted senescent cells, which fits the hypothesis that senescence is a  
68 mechanism to limit cancer<sup>15,16</sup>. In our study of 169 individuals, we found that a predicted  
69 senescent cell load above the age-dependent average correlated with reduced incidence of  
70 malignant skin-diagnosis at 33.3%, compared to 48.9% for patients with predicted senescence  
71 below average. Further, a predicted senescent cell load above the age-dependent average  
72 correlated with reduced incidence of non-skin related cancer at 16.0% compared to 29.5% for  
73 patients with predicted senescence below average. While oncogenic events are associated with  
74 the formation of senescent cells<sup>15</sup>, we speculate that individuals with higher propensity toward  
75 developing senescent cells have reduced formation of malignant neoplasm and are at lower risk  
76 of cancer.

77

## 78 **Results**

79

80 Several fibroblast cell lines, maintained in cell culture, were treated to induce senescence by  
81 ionizing radiation (IR) or passaged until they reach replicative senescence (RS) (**Fig. S1a, b, c**).  
82 After fluorescent staining with DAPI to highlight the nuclear DNA, the cells were imaged with a  
83 high content microscope. Nuclei were detected using a deep convolutional neural network

84 based on U-net, which produced output images containing the detected nuclear regions. Each  
85 detected nucleus was extracted into a cutout for subsequent analysis. We applied several  
86 methods to normalize features in images, such as removing the background, standardizing the  
87 size of the nuclei, and even masking inner details of the nuclei (**Fig. 1a, b**).

88

89

## 90 **Senescent Cells Display Altered Nuclear Morphology**

91

92 A morphological analysis of the detected nuclei was performed to compare control cells to those  
93 that were senescent. There was a significant difference in nuclear area for each of the three  
94 groups with increased nuclear area as previously reported<sup>12</sup>. In addition, IR senescent cells  
95 were significantly larger than RS cells (**Fig. 1c**). Aging and certain premature aging diseases  
96 have been associated with greater irregularities or folds in the nuclear envelope<sup>17,18</sup>. We  
97 therefore evaluated convexity, which is a ratio of nuclear area to convex hull area, as a measure  
98 of the nuclear envelope regularity. Convexity showed the shape of control cells were more  
99 regular compared to both IR and RS, which had a more irregular boundary (**Fig. 1d**). RS has  
100 the lowest convexity value, indicating the highest irregularity (or lowest regularity). This indicates  
101 convexity is another measure of senescence, with lower values corresponding to increased  
102 senescence. In addition, we looked at aspect ratio, a measure of width compared to height  
103 (measured as the longest compared to shortest dimensions of a minimized rectangle around  
104 each nucleus) and found that both IR and RS had higher values compared to controls (**Fig. 1e**).  
105 We compared area and convexity per nuclei, observing overlapping clusters for the three states  
106 with area of RS overlapping both control and IR, and convexity of RS and IR overlapping (**Fig.**  
107 **1f**). Interestingly, the distribution of the area of the IR senescent cells was bimodal, with the  
108 lower mode matching RS and a higher mode at almost twice the area of the RS, perhaps  
109 suggesting IR induced aneuploidy or stalling at the G2 checkpoint of the cell cycle (**Fig. 1f**,

110 upper histogram distribution of joint scatter plot). Simple nuclear morphological measures  
111 appear to be a viable method for assessing cellular senescence *in vitro*.

112

113

## 114 **A Deep Learning Classifier Accurately Predicts Senescence Based on DAPI staining**

115

116 Given the rich structure of nuclei and potentially broad set of features, we applied deep neural  
117 networks to better assess senescence. A custom convolutional neural network was trained  
118 using 80% of the samples, while 20% was held out for validation. After seeing accuracy  
119 converge to a steady level, the model was applied to validation data. We also compared our  
120 custom network to Xception, one of the top performing models for image classification that has  
121 been often applied to biomedical classification<sup>19,20</sup>. Xception achieved superior results with an  
122 f1-score of 94%, accuracy of 95%, and AUC of 0.99 with validation data (**Fig. 1g, h, i**). To  
123 eliminate any potential overfitting on the experimental context and cell lines, we evaluated the  
124 model on an independent data set of two additional cell lines, which were prepared and imaged  
125 separately. This achieved an f1-score of 92%, accuracy of 94%, and AUC of 0.96 (**Fig. S2a, b,**  
126 **c**). The mean probability of senescence per nuclei is 0.18 for controls, 0.86 for RS, and 0.91 for  
127 IR (**Fig. 1j**), indicating senescence for 12.7% of controls, 92.0% of RS, and 95.6% for IR using  
128 the standard threshold (**Fig. 1k**).

129

130 In another experiment, deep neural networks were trained to detect control compared to  
131 different senescent types, IR and RS. Xception, trained similar to the dual state experiment  
132 above, produced a mean class accuracy of 78.6% in detection of the three states, with 83.3%  
133 for controls, 75.7% for RS, and 76.8% for IR (**Fig. S2d, e**). It achieved a relatively high AUC of  
134 0.9 for RS and 0.95 for IR. In sum, nuclear morphology represents a strong predictor of both  
135 replicative and DNA damage induced senescence.

136

137

## 138 **Nuclear Shape Is A Central Predictive Feature in Senescent Cells**

139

140 Nuclei images contain several features that could be used for classification; however, it is  
141 unclear what the deep neural network is using as its basis for assessment. Nuclear area,  
142 staining intensity and even the image background itself could contain a signal that the neural  
143 network is picking up on. To provide some insight into how much these potential factors  
144 contribute to senescence classification, we trained several models based on reduced forms of  
145 the cutout library. Our base model already includes brightness standardization. First, the  
146 background of the nuclei was masked, by excluding all areas outside of the U-Net detected  
147 nuclear region. Next, we applied size normalization, such that the greater of the width and  
148 height was set to a standard pixel size. Finally, we converted the interior of nuclei to a single-  
149 color value, essentially masking all internal structure. With each reduction, we observed a slight  
150 decrease in classification accuracy when applied to independent test lines (**Fig. 1l**). The  
151 background masking produced 86% for the f1-score and 88% for accuracy, a small reduction  
152 indicating limited reliance of the background. With background masked and size normalized, a  
153 trained model produced 87% for f1-score and 88% for accuracy, showing area and size played  
154 little role in senescent detection. This model was further reduced by completely masking the  
155 internal structure of the nuclei, which led to an f1-score of 80% and accuracy of 78% (**Fig. S2f,**  
156 **g**). While masking was a significant reduction in accuracy, it is remarkable that so much  
157 information could be removed from nuclear images and still obtain a relatively accurate  
158 classification of senescence. These experiments suggest that classification is largely based on  
159 the overall shape of the nuclei. We explored this further by evaluating Pearson correlation  
160 between predicted senescence and several morphological metrics, finding that area was  
161 moderately correlated but both convexity and aspect ratio were weaker (**Fig. 1m**). The deep

162 learning model appears to be picking up on the nuclear shape in a more sophisticated manner  
163 than simply aspect ratio or convexity.

164

165 The final reduced model yields an overall accuracy of 78%, and it shows an imbalanced per  
166 class accuracy of 73.9% for control, 69.3% for RS, and 91.4% for IR. It maintains a good AUC  
167 of 0.88. With similar reductions, the three-state senescent type detector model shows overall  
168 accuracy of only 58% (**Fig. S2h, i**). The RS state has poor accuracy at 31.3%, but 87.7% for  
169 controls and 56.1% for IR. The AUC has declined to 0.71 for RS and 0.6 for IR. Despite  
170 lowering accuracy, the feature standardization and reduction makes the model less influenced  
171 by a large number of technical variations such as image intensity, choice of staining method,  
172 magnification and others that could impact the utility of the predictor.

173

174

## 175 **Classification with Confidence**

176

177 While overall accuracy per-nuclei was relatively high, a sizable number of nuclear images were  
178 ambiguous, which can be interpreted as the model being uncertain in its prediction. Extending  
179 neural networks with Bayesian properties has several advantages, most notably providing a  
180 measure of confidence for predictions<sup>21</sup>. The Bayesian Neural Networks (BNN) allows for the  
181 construction of a posterior probability distribution which can be used for interval estimation,  
182 compared to a single prediction from a classic neural network. Samples can be filtered to  
183 reduce the ambiguous cases by requiring higher mean probability from the BNN. Using  
184 Tensorflow Probability, we developed several BNNs. Our custom model converted to a BNN  
185 performed adequately for raw cutouts, but it would not train well for the masked/normalized  
186 nuclei. We partially converted Xception to utilize Flipout nodes<sup>22</sup>, leaving the separable  
187 convolutions as point estimate nodes. We also fully converted InceptionV3 as an alternative



188 model. Our partial BNN of Xception produced an f1-score of 84%, accuracy of 86%, and AUC of  
189 0.92 (**Fig. S2j, k**). The full BNN for InceptionV3 gave an f1-score of 79%, accuracy of 80%, and  
190 AUC of 0.87 (**Fig. S2l, m**). The BNN models can be thus be used to understand the probability  
191 distribution of the data but at a lower accuracy.

192

193

## 194 **A Deep Neural Network Ensemble Increases Predictive Power**

195

196 After training the senescent classifier through different sessions, we saw variance in the  
197 predictions for a subset of samples. Exploring a large multidimensional solution space during  
198 training, neural networks select a relatively good solution that is often biased to favor certain  
199 classes<sup>23</sup>. Using an ensemble of deep models, the predictions can be combined as though  
200 consulting a collection of experts (or interpreted as the “wisdom of the crowd”). To achieve this,  
201 we trained an ensemble with random initial weights, potentially allowing convergence to different  
202 local minima. We found that there is consistent agreement for the majority of samples, however,  
203 there is a significant percent of edge cases with a high variance in predictions among the model  
204 instances (**Fig. 2a**).

205

206 We therefore speculate that using an ensemble of deep models for inference and aggregating  
207 the results provides predictions with less bias and higher confidence (**Fig. 2b**). Evidently, some  
208 models balance the accuracy of each class in the middle of the range (75-80%), while other  
209 models skew toward one class at the expense of the other (for example, obtaining ~85% on one  
210 but ~70% on the other). While ensembles have benefits like a BNN, they can be less biased  
211 since each ensemble member can specialize around a solution, while a BNN is confined to a  
212 single local minima in solution space. Accordingly, we obtained good results with the ensemble  
213 method, with an f1-score of 91%, accuracy of 94%, AUC of 0.98 (**Fig. 2c, d**). More importantly,

214 the ensemble provides a higher confidence and less biased approach by combining multiple  
215 models that specialize in predicting different classes.

216

### 217 **An ensemble of neural networks outperforms Bayesian neural networks.**

218 We also tried Bagging, where bootstrapping with replacement selects a subset of the samples  
219 to use in training independent models. This method did not provide a significant improvement  
220 over the basic deep ensemble method (**Fig. 2e**). The BNN models can be used to improve  
221 confidence but sacrifice performance, while the ensemble models provide both (**Fig. 2e**). We  
222 therefore further evaluated the deep ensemble method with masked and normalized samples.  
223 This produced an f1-score of 80%, accuracy of 82%, and AUC of 0.89 (**Fig. 2f, g**), which  
224 improved upon the single model. The ensemble method was also applied to the tri-state model  
225 to distinguish senescent type, which achieved overall accuracy of 66% and AUC of 0.81 for RS  
226 and 0.92 for IR (**Fig. 2h, i**). While this is lower accuracy, it is an overall improvement of 23.64%  
227 compared to the single normalized tri-state model. With all states well above the 33.3%  
228 accuracy expected from random predictions, this model is capable of recognizing type of  
229 senescence given an adequate sample size.

230

231 Due to the lower performance of senescent type prediction, we trained deep models on each  
232 type of senescence exclusively, training for control vs RS-only or control vs IR-only. This left the  
233 other state undefined, assessing each type of senescence separately. Both models classified IR  
234 with high accuracy, but the RS-only model recognized RS with ~13% higher accuracy, while the  
235 IR-only misclassified those as control (**Fig. 2j, k**). Ensembles of deep neural networks clearly  
236 allow for greater accuracy for senescence prediction.

237

238

239

## 240 **Modifying Thresholds Increases the Accuracy of Prediction and Improves Confidence**

241  
242 Deep neural networks utilizing one-hot node outputs with the softmax function are trained to  
243 produce numerical values that are sometimes treated as the probability for each state. They  
244 should not be interpreted as model confidence, but by sampling from a BNN or deep ensemble,  
245 we can utilize the distribution to determine uncertainty<sup>21</sup>. We evaluated the predictions for the  
246 BNN and deep ensemble (**Fig. S3a, b**). Correct predictions are indeed oriented toward the  
247 lower and higher range of the softmax output, representing greater certainty about a sample's  
248 state. In both cases, the incorrect predictions are clustered toward the center with the 0.5  
249 threshold. Different models could be biased toward either state by shifting those ambiguous  
250 samples across the threshold.

251  
252 We can assume higher confidence in a model's predictions by raising the classification  
253 threshold (of both one-hot states, thereby filtering the predictions in the middle). We therefore  
254 evaluated the accuracy using a range of thresholds from 0.5 up to 0.95 in the single model, the  
255 Xception BNN, the ensemble of models, and the ensemble of fully normalized models (**Fig. S3c,**  
256 **d, e, f**). In all cases, we see a significant increase in accuracy as the threshold is raised, due to  
257 the ambiguous samples being discarded. By raising the threshold, the Xception-based BNN  
258 goes from 85.6% to 96.0%, while the ensemble of normalized models goes from 81.6%  
259 accuracy to 97.2%. A similar approach was applied to other models, including the IR-only and  
260 RS-only models (**Fig. S3g, h**). Raising the threshold, these also showed a gain in accuracy of  
261 10-15%. Unfortunately, this led to a significant reduction in the number of samples considered.  
262 There is a tradeoff between number of predictions and accuracy, which must be balanced for  
263 each application to ensure suitable power for analysis.

264

265 The tri-state model, which distinguishes between IR and RS, showed lower accuracy, especially  
266 when applied to the fully normalized samples (**Fig. S2h, i**). As a deep ensemble, we see  
267 accuracy of 86.8% for control, 50.3% for RS, and 61.7% for IR. Since there are three states,  
268 even the 50.3% accuracy with RS places the majority of its samples in the correct category, with  
269 40.3% a FN appearing as control and 9.4% as IR. It's ROC curve has AUC of 0.81 and 0.92 for  
270 IR. Applying threshold adjustments, we see the overall accuracy go from 80% up to 95%.  
271 Maintaining a majority of samples, a threshold of 0.8 exceeds 90% accuracy.

272

273

#### 274 **DNA Damage Foci and Area Correlates with Senescent Prediction**

275

276 Senescent cells are associated with permanent increase in nuclear foci of the DNA damage  
277 markers  $\gamma$ H2AX and 53BP1<sup>24,25</sup>. We characterized the DNA damage response (DDR) foci for our  
278 cell lines and investigated how these foci relate to predicted senescence. Our base data set  
279 including control, RS, and IR lines were examined for damage foci. Using high content  
280 microscopy, we counted DNA damage foci per nuclei and found the mean count of  $\gamma$ H2AX and  
281 53BP1 foci to be below 1 each (0.9 and 0.6, respectively) for controls, while RS had 4.0  $\gamma$ H2AX  
282 and 2.0 53BP1 foci and IR had 3.4  $\gamma$ H2AX and 3.0 53BP1 foci (**Fig. 3a, b, S4a**). To study how  
283 the presence of damage foci relates to predicted senescence we calculated the Pearson  
284 Correlation between predicted senescence and  $\gamma$ H2AX and 53BP1 foci counts. We found that  
285 across all conditions there is a moderately strong correlation of around 0.5 (**Fig. 3c**). This  
286 association is also visible when simply plotting foci counts and senescence prediction which  
287 shows predicted senescence flipping from low to high, along with shifts in foci counts (**Fig. S4b**).  
288 The same pattern applies to area, with shifts in the concentration of area along with shifts in the  
289 predicted senescence, aligning well with cell conditions. Within senescent subtypes RS and IR,

290 the correlation is slightly weaker, perhaps indicating that the senescent probability score for  
291 each subtype has some correlation with foci count. Our feature reduction including masking  
292 means that internal nuclear structure was not used in assessment, but it is nonetheless notable  
293 that senescence prediction (overall and by subtype) correlates with foci count. We also  
294 compared the correlation between predicted senescence and area. Here too, we see a  
295 correlation of around 0.5, and slightly weaker for the subtypes. In sum, there is a considerable  
296 correlation between foci counts and senescence.

297

298

### 299 **Progeria Cell Lines Display Increased Senescence**

300

301 Patients suffering from premature aging, or progeria, represent genetically well-defined models  
302 to understand the molecular basis of aging<sup>26,27</sup>. To test if cell lines from progeria patients display  
303 accelerated aging *in vitro*, we applied the senescent classifier to primary fibroblasts isolated  
304 from Hutchinson-Gilford progeria syndrome (HGPS), ataxia telangiectasia (AT) and Cockayne  
305 syndrome (CS) (**Fig. 3d**). Evaluating the area of the nuclei of progeria cells, we found that in  
306 general their mean is significantly larger than controls. Notably ataxia-telangiectasia cells have  
307 the largest nuclei at 25% higher than controls, while Hutchinson-Gilford progeria and Cockayne  
308 syndrome are both 15% higher (**Fig. 3e**). We also investigated DNA damage foci and observe  
309 that most prematurely aged lines have higher  $\gamma$ H2AX and 53BP1 foci counts (**Fig. 3f, g** and **Fig.**  
310 **S4c**). Further, despite diverse mechanisms, the classifier recognized these cell lines having  
311 significantly greater probability of senescence (**Fig. 3h**). All progeria lines have high mean  
312 probability of senescence at 0.7, indicating that the average cell in each group is considered  
313 senescent, while controls are below the standard threshold at 0.3. These observations suggest  
314 that our classifier may be able to discriminate rates of aging *in vitro*.

315

316 **The senescent classifier translates across species and cell types**

317

318 To broaden the applicability of our classifier we speculated that it might apply to nuclei from  
319 other cell lines and species. We therefore evaluated the model on mouse astrocytes, which  
320 were treated with IR (**Fig. 3i**). We first compared the nuclei area and found that the IR treated  
321 astrocytes had slightly but significantly larger nuclei than controls (**Fig. 3j**). To test if senescence  
322 classification is based on area, we calculated the Pearson Correlation Coefficient between  
323 these two measures. With a PCC=0.12 and p-value  $4.6 \times 10^{-69}$ , we find only a weak relationship  
324 between area and senescence. Evaluating DNA damage foci, we see that IR treated astrocytes  
325 have substantially higher foci count as expected (**Fig. 3k, l, and S4d**). We next applied the  
326 ensemble of deep models (without normalization) and found that the IR treated cells had a 9%  
327 higher probability of senescence than controls (**Fig. 3m**).

328

329 We also applied the model to H&E stained liver tissue from C57Bl6 mice at taken at 48, 58, and  
330 78 weeks of age. After imaging the tissue sections at 20x, we used a deep learning  
331 segmentation model trained on 18 tiles to extract nuclei from 16,187 tiles (**Fig. 3n**). We first  
332 analyzed morphological metrics, finding an insignificant increase in nuclear area (**Fig. 3o**).  
333 However, we saw a significant decrease in convexity and increase in aspect ratio, both  
334 indicating increased senescence with age (**Fig. 3p, q**). Nuclei were evaluated for senescence  
335 using the normalized RS-only and IR-only models, of which the RS model indicated increasing  
336 senescence with age while the IR model did not significantly increase (**Fig. S4e, f**). Using the  
337 probability, we calculated the percent of senescent cells, finding ~36% for RS and ~99% for IR.  
338 The predictor is trained on *in vitro* DAPI stained fibroblasts representing a considerable  
339 difference in context, it is therefore likely that the algorithm should be tuned to evaluate other  
340 data sources. Applying thresholds of 0.8 and 0.94 for RS and IR, respectively, the percent was  
341 brought down to roughly 1-2% each to match the reported senescent rate in the liver<sup>28</sup>. With

342 these thresholds, the percent of senescent cells per mouse increased with age (**Fig. 3r,s**).  
343 Given the differences in human and mouse nuclei as well as between cell types, it is notable  
344 that the senescent state can be captured through the relative difference in assessed probability.  
345 It therefore appears that our predictor may be able to determine senescence across cell types  
346 and species.

347

348

### 349 **The human dermis shows age-dependent increase in senescent nuclei**

350

351 To further investigate if the predictor could be applied in a clinical context, we tested the  
352 algorithm on human skin samples of 169 individuals aged 20-86 years. The senescent classifier  
353 was evaluated on the dermal nuclei from biopsy samples stained with H&E and imaged in a  
354 slide scanner at 20x. We applied U-Net to detect nuclei, extracted nuclear regions, and  
355 converted the nuclei to the normalized and masked form (**Fig. 4a**). We first evaluated several  
356 morphological metrics, including area, convexity, and aspect ratio. Across age, we see no  
357 change in area (**Fig. 4b**), an insignificant change in convexity (**Fig. 4c**), and a significant change  
358 in aspect ratio (**Fig. 4d**). Applying the senescent predictor, the probability of senescence  
359 increases with age of patients for RS but is relatively flat for IR (**Fig. S5a, b**). We applied the  
360 standard softmax threshold and evaluated the percent of cells considered senescent, which  
361 yielded means of 25% for RS and 40% for IR. The percent was significantly higher than we'd  
362 expect for human dermal nuclei, ranging from mean of ~1% in young to ~15% in old<sup>28</sup>. Our fully  
363 normalized model has a relatively high FP rate (20% for RS and 12% for IR), and human dermal  
364 nuclei are disproportionately non-senescent, likely exaggerating the predicted senescence. We  
365 therefore adjusted the threshold to reduce false positives and attempt to compensate for the  
366 large biological difference. To calibrate the model to the level of senescence expected for  
367 dermal nuclei, we set the cutoff to 0.7 for RS and 0.85 for IR, which lowered the percent for all

368 patients to a mean of ~6% each and showed an age-dependent increase in percent of  
369 senescence (**Fig. 4e, f**). We also evaluated the correlation between morphological metrics and  
370 predicted senescence and found moderate correlation for several metrics, but RS was more  
371 correlated with convexity while IR was more correlated with area and aspect ratio, perhaps  
372 indicating morphological aspects of each type of senescence *in vivo* (**Fig. S5c**). Interestingly,  
373 we found that area was anti-correlated with both forms of predicted senescence and predicted  
374 probability of IR was inverse to aspect ratio (**Fig. S5c, d**). This again emphasizes the difference  
375 between senescence *in vitro* and in tissue and also affirms that the IR and RS model are picking  
376 up on different aspects of senescence.

377

378

#### 379 **Senescent dermal nuclei are inversely associated with neoplasms**

380

381 Given the large variation in predicted senescence, we speculated that these values could  
382 represent meaningful health outcomes. To investigate, we retrieved ICD-10 diagnosis codes  
383 collected in the Danish National Patient Register from 1977 to 2018 for all the individuals in the  
384 study (**Fig. 4g**). We looked for associations between individuals with diagnosed conditions and  
385 predicted senescence above or below the age-dependent mean (those above or below the  
386 trendline in **Fig. S5a, b**, specifically using residuals from linear regression of RS versus age or  
387 IR versus age), using the chi-square test for the frequency of occurrence between the two  
388 groups (**Fig. 4h, i**). Remarkably, we found a significant correlation between a rate of  
389 senescence below the age-matched mean and the presence of ICD-10 Chapter II Neoplasm  
390 diagnosis codes for both RS and IR, with p-values of 0.0002 and 0.002, respectively (**Fig. 4j**).  
391 Narrowing down the analysis we determined the association was based on malignant (versus  
392 benign or unknown) codes within ICD-10 Chapter II Neoplasm with IR p-value at 0.037 and RS  
393 at 0.018 (**Fig. 4k**). Furthermore, grouping specific cancer codes together, we determined that



394 RS is significant for both skin and non-skin cancer, with p-values at 0.041 and 0.037  
395 respectively (**Fig. 4l, m**). IR was non-significant for non-skin and on the edge of significance for  
396 skin with p-value at 0.053. Notably, RS better represents replicative senescence which occurs  
397 naturally with age, while IR better represents DNA damage, although there is considerable  
398 overlap in predictions between the two with this model. Overall, we found that high assessed  
399 senescence corresponds to fewer neoplasms and malignancies, including both skin and non-  
400 skin.

401

402

## 403 **Discussion**

404

405 In this paper we present a neural network that can predict cellular senescence based on nuclear  
406 morphology. Trained on fibroblasts maintained in cell culture, the classifier achieves very  
407 accurate results, which was confirmed by applying it to independent cell lines. We also trained  
408 models to correctly distinguish between senescence caused by radiation induced damage and  
409 replicative exhaustion. By training additional models on samples with reduced features, we infer  
410 that the shape of the nucleus alone provides a significant signal to indicate senescent state.  
411 DAPI-stained nuclei with background removed, size normalized, and internal structure masked  
412 are still classified with high accuracy. These feature reduction methods serve a secondary  
413 purpose, making a model robust to technical variation - our neural network trained on reduced  
414 samples can make predictions on nuclei that were prepared in other experimental and imaging  
415 contexts. Indeed, the predictor distinguished senescent astrocytes, predicted an age-related  
416 increase in senescent liver cells, and confirmed senescence in cell lines from patients suffering  
417 from premature aging. Although it is still debated if universal markers of senescence exist, our

418 findings suggest that at least morphological alterations in nuclei may be common across some  
419 tissues and species.

420

421 Our data shows that individuals with a predicted higher rate of senescent cells have reduced  
422 neoplasms and malignant cancer, in comparison to those with a lower rate of senescence.

423 This is highly consistent with the notion that senescence is a likely mechanism to control cancer

424 development by limiting uncontrolled proliferation<sup>29</sup>. Further, premalignant tumors express

425 markers of senescence, which are absent in malignancies, and malignant tumors can regress

426 and undergo senescence by switching off oncogenes<sup>15</sup>, supporting the protective role of

427 senescence in blocking the progression of neoplasms to malignancies. In addition, loss of

428 central senescence inducers such as p16 are very common in many cancer types<sup>30</sup>. Of note,

429 there is also evidence suggesting that cellular senescence promotes malignancy through the

430 inflammatory senescence associated secretory phenotype (SASP)<sup>31</sup>, that senescent cells may

431 appear in areas where tumors tend to subsequently develop<sup>32</sup>, and that senescent cells and

432 SASP induced by cancer treatment led to worse survival and healthspan<sup>33</sup>. While the role of

433 senescence in cancer is highly complex, our results based on clinical data support the overall

434 protective role for senescence in human health.

435

436 We also investigated how our deep learning predictor results correspond to other measures of

437 senescence. Nuclear area is known to expand during senescence<sup>12,34,35</sup>, and we confirmed this

438 in our *in vitro* data set, with significant differences in IR and RS senescent cells. On a per nuclei

439 basis, we found a moderate correlation between area and predicted senescence. However, due

440 to our size normalization, it is unlikely this classic feature is the primary signal for our deep

441 learning model (at least for the size-normalized version). We also identified convexity and

442 aspect ratio as key morphological properties that differ between control and senescent cells *in*

443 *vitro* and found moderate correlation between each of these properties and predicted

444 senescence. Interestingly, we found no increase in area with age in the human dermis, but a  
445 significant increase in aspect ratio and significant decrease in convexity, indicating nuclei  
446 becoming stretched and irregular with advancing age in humans. These observations confirm  
447 that size normalization is necessary to generalize our neural network classifier. It also  
448 demonstrates the value of our feature-neutral approach, where the neural network is trained to  
449 identify senescence from rich image data, and it is only later reduced through feature removal.

450

451 In sum, our deep neural network model is capable of accurately predicting the senescent state  
452 and type from nuclear morphology using several imaging techniques and has been  
453 demonstrated with several diverse applications. We applied the predictor to human skin  
454 samples and observed an age dependent increase in senescence. Remarkably, individuals who  
455 appear to have higher rates of senescent cells show reduced incidence of malignant  
456 neoplasms. This supports the long-standing hypothesis that senescence is a mechanism to limit  
457 cancer.

458

## 459 **Methods**

460

### 461 **Cell culture**

462 All human-derived primary skin fibroblast cells were purchased from Coriell Institute (USA).  
463 Control fibroblasts included AG08498 (male, 1 year), GM22159 (male, 1 day), GM22222 (male  
464 1 day), GM03349 (male, 10 years) and GM05757 (male, 7 years). Cells were cultured at 37C  
465 and 5% CO<sub>2</sub> either in 1:1 mix of DMEM GlutaMAX (Gibco, 31966047) and F-12 media (Gibco,  
466 31765068) for AG08498, GM22159 and GM22222 or in EMEM media (Biowest, L0415-500) for  
467 GM03349 and GM05757. Fibroblasts derived from Hutchinson-Gilford progeria syndrome  
468 patients included AG06917 (male, 3 years), AG06297 (male, 8 years) and AG11513 (female, 8

469 years). Fibroblasts sampled from ataxia telangiectasia and Cockayne syndrome patients were  
470 GM03395 (male, 13 years) and GM01428 (female, 8 years), correspondingly. Cells were  
471 cultured at 37C and 5% CO<sub>2</sub> in MEM media (Lonza, BE12-662F). Freshly isolated primary  
472 mouse astrocytes were kindly provided by the Department of Drug Design and Pharmacology,  
473 University of Copenhagen. Cells were cultured at 37C and 5% CO<sub>2</sub> in DMEM GlutaMAX (Gibco,  
474 31966047). All used media were supplemented with 10% fetal bovine serum (Sigma-Aldrich,  
475 F9665) and 100 U/mL penicillin-streptomycin (Gibco, 15140163).

476

477

#### 478 **Senescence induction**

479 To achieve replicative senescence control fibroblasts at early passages were seeded in T25 cell  
480 culture flasks (200 000 cells) and cultured over 32 weeks. After each splitting cell number was  
481 recorded and population doubling level (PDL) was calculated as  $\text{Log}_2(\text{cell number during}$   
482  $\text{harvesting/cell number during seeding})$ . Experiment was terminated when PDL reached zero.  
483 DNA damage-induced senescence was performed according to reference<sup>36</sup>. Briefly, control  
484 fibroblast cells at yearly passages were seeded in 96 well plates (Corning, 3340) in a density of  
485 2 000 cells per well. Day after cells were exposed to 10Gy of ionizing radiation and cultured for  
486 the next nine days. Medium was replaced every two days. Three days before radiated cells  
487 reached senescence state, fibroblast cells from the same stock were seeded (2 000 cells/well)  
488 as mock-irradiated control.

489

#### 490 **Immunocytochemistry, SA-bGAL detection and image preparation**

491 For detection of persistent DNA damage foci, fibroblast cells were washed once with warm PBS,  
492 fixed in 4% paraformaldehyde (PFA) for 15 min followed by permeabilization step with  
493 incubation for 10 min in PBS-0.1% Triton X100. Blocking was performed in 1% BSA-PBS-0.1%  
494 Tween 20 overnight at 4C. Next day cells were incubated with primary antibodies ( $\gamma$ H2AX,

495 1:1000, Millipore, 05-636 and 53BP1, 1:2000, Novus, NB100-304) for 1h at RT, washed three  
496 times with PBST and incubated with secondary antibodies (1:200 Alexa-Flour 488, Invitrogen,  
497 10424752 and 1:200 Alexa-Flour-568, Invitrogen, 10348072) for 1h at RT. Cells were incubated  
498 with DAPI solution (AppliChem, A4099) for 10 min and stored in PBS at 4C until the analysis.  
499 SA-bGAL was detected using senescence cells histochemical staining kit (Sigma-Aldrich,  
500 CS0030) according to manufacturer's protocol. Cell colonies were imaged using INcell analyzer  
501 2200 high content microscopy at 20x magnification to produce 1199 images with 2048x2048  
502 pixel resolution. Due to system constraints for object detection, each image was split into four  
503 tiles of 1024x1024 pixel resolution.

504

505

#### 506 **Nuclei Detection**

507 A base library was prepared using controls, irradiated (IR), and cells serially passaged until they  
508 reached senescence (replicative senescence, RS). A deep neural network model was applied to  
509 detect DAPI-stained nuclei. The samples were used to build a training set for nuclei recognition.  
510 Several images were selected arbitrarily from each group for a total of ~20 samples, and using  
511 custom software all nuclei in the training samples were annotated by selecting the nuclear  
512 region. U-NET, a 23-layer fully convolutional network for image segmentation, was trained using  
513 the samples, learning to associate the DAPI images with annotation masks indicating nuclear  
514 regions. Our implementation of U-NET is largely based on the original U-NET<sup>37</sup>, but includes a  
515 dropout layer after each of the convolutional and deconvolutional layers to reduce overfitting.  
516 After training for 1000 epochs, the U-NET model was used to detect nuclei for all 4796 tiles  
517 (1199 images x 4 tiles/image), producing output images of predicted nuclei regions. The images  
518 with predicted nuclei were scanned for recognition regions of area between 500 and 15,000  
519 pixels. Each detected nucleus was extracted along with its surrounding context as a centered  
520 128x128 pixel region and used to assemble a base library of 95,152 nuclei. In addition, the

521 recognition region itself was cutout, providing a two-color reduction of the detected nuclei, and  
522 assembled into a secondary library of nuclei masks.

523

524

### 525 **Nuclear Morphology**

526 An analysis of the nuclei was performed to assess morphological properties. The cutout nuclei  
527 were analyzed using image processing methods, such as Gaussian blur and Otsu thresholding.  
528 While these methods generally performed well for DAPI-stained nuclei, it was unsuitable for  
529 related data sets (H&E-stained histology images). Instead, the two-color masks library was  
530 used, since it provided a universal representation of the detected nuclei (with U-NET detector  
531 models that have good coverage of the nuclei region). Nuclear morphology was assessed using  
532 several metrics, including area, perimeter, moments, convexity, and aspect ratio. Convexity is  
533 the ratio of perimeter to convex hull perimeter, which provides a size-neutral measure of  
534 boundary regularity. The convex hull is a polygon that connects the outer edges of nuclei like an  
535 envelope.

536

537

### 538 **Senescent Classification**

539 After assembling a library of senescent cells, a deep neural network was trained to classify  
540 DAPI-stained nuclei as senescent or non-senescent. Training samples were randomized and  
541 split into 80% for training and 20% for validation. Due to experimental setup, the sample classes  
542 are unbalanced, with 75.2% control, 11.2% RS, and 13.6% IR. The samples were balanced  
543 during training by applying class weights with inverse proportion to the class abundance (for  
544 example, *senescent* samples composed of IR and RS were fewer in number and therefore  
545 valued 3x higher than controls). Image samples were normalized for brightness/intensity by  
546 adjusting each image's mean intensity to 0 and standard deviation to 1. Augmentation was also

547 applied during training, randomly modifying samples: adjusting size from 80% to 120%,  
548 changing normalized brightness from 70% to 130%, flipping horizontally and vertically, and  
549 rotating up to 180 degrees. For each epoch, one augmentation cycle was performed. Training  
550 was done with Xception, a 48-layer model, initialized with ImageNet weights but set to allow  
551 weight adjustment of all layers during training. The top layer was replaced by a layer of one-hot  
552 nodes to indicate the state as controls or *senescent* (or as a tri-state model with controls, IR, or  
553 RS to indicate the type of senescence). With this minor adjustment, the model provided  
554 37,640,234 trainable parameters. Training was done using Adam with the learning rate set to  
555  $1 \times 10^{-4}$  for 10 epochs, in which time accuracy rapidly converged to a steady level. In addition, a  
556 simpler custom model was tested, with three convolutional layers with ReLU activation and two  
557 dense layers with L1/L2 regularization of 0.05/0.05 and 30% dropout. This model required  
558 713,296 parameters. For both network designs, we trained with raw images along with several  
559 modified image sets, where the background was removed, the nuclei were size normalized, and  
560 the inner details of nuclei were entirely masked (**Fig. 1a**). All three techniques were based on  
561 the detected nuclei. To remove the background, the area outside of the nuclei was set to 0. Size  
562 was normalized by rescaling all nuclei so the larger of the two dimensions was a standard size  
563 of 80 pixels. Finally, the size-normalized detection region was used for the masked nuclei set.

564

565

## 566 **Bayesian Neural Network**

567 We used Tensorflow Probability to create a Bayesian neural network (BNN). We first converted  
568 the simple custom model, replacing nodes with the comparable FlipOut version<sup>22</sup>, which  
569 assumes that the kernel and bias are drawn from a normal distribution. During a forward pass,  
570 kernels and biases are sampled from posterior distribution. Targets were encoded as above,  
571 and the loss function used was cross entropy plus KL divergence divided by number of batches.  
572 We also partially converted Xception to a BNN by replacing all dense and convolutional layers

573 to FlipOut nodes, leaving separable convolutions unconverted since a FlipOut version was not  
574 available. In addition, we fully converted InceptionV3 for evaluation. Inference was done by  
575 evaluating the model 20 times to produce a distribution of predictions, and then taking the mean  
576 probability for each sample.

577

578

### 579 **Deep Neural Network Ensemble**

580 To improve accuracy and provide a more robust solution, we also worked with an ensemble of  
581 deep learning models. This method utilized 10 models of Xception, each trained on the same  
582 data set with different random weight initialization. To generate predictions, each model  
583 instance was applied, and the results combined by taking the mean prediction. We also tried  
584 bagging, also known as bootstrap aggregation. Similar to the deep ensemble, this method trains  
585 different model instances with bootstrap selection of samples for  $n=1-1/e$ . With each instance  
586 trained on a different subset of samples, this method produces multiple models that in theory  
587 can specialize to different sets of data.

588

589

### 590 **Statistical Methods**

591 All comparisons with between groups of samples were made using one-way ANOVA f-tests to  
592 evaluate differences in the means, followed by pair-wise tests using Tukey's HSD (Honest  
593 Significant Difference) to calculate p-values between groups. Linear regression methods were  
594 evaluated with R and p-value statistics. Groups of patients were compared using the chi-  
595 squared test to detect significant differences between frequencies. Correlation was evaluated  
596 using the Pearson colocalization coefficient.

597

598



599 **Pathology sample selection**

600 The individuals were sampled from patients for whom samples of naevi on non-sun exposed  
601 skin had undergone pathology without malignant findings at a major pathology department in  
602 Copenhagen. The patient sample was selected to have flat distribution of age. We selected  
603 patient samples from the Danish National Register of Pathology requisitioned in 2007-2017 and  
604 coded with one or more PatoSNOMED topology code: T02530 (Skin on penis), T76330  
605 (Foreskin) ,T80200 (Mons pubis), T02471(Skin on nates), T02480 (Skin on abdomen), T02430  
606 (Skin on breasts) and one or more procedure code: P30620 (resect), P306X0 (ectomy  
607 preparation), P30611 (excision biopsy) and one or more morphology code: M87400 (junction  
608 naevus), M87500 (dermal naevus), M87600 (compound naevus).

609

610

611 **Senescence and Human Morbidity**

612 We collected ICD-10 diagnosis codes from the Danish National Patient Register in the period  
613 1977-2018 of each of the patients in this study. We further grouped diagnoses into each of 21  
614 ICD-10 chapters. We calculated the linear regression residuals of the relationship between age  
615 at pathology examination and the predicted senescent cell load (IR, RS metrics) for each of the  
616 patients. We then constructed contingency tables counting the number of patients with and  
617 without a specific diagnosis and with a predicted senescent cell load above or below the age-  
618 dependent average. We used Pearson's chi-squared test to determine whether patients with a  
619 predicted senescent cell load above or below the age-dependent average were associated with  
620 a higher or lower incidence of specific diagnosis codes (or diagnosis within a specific ICD-10  
621 chapter.)

622

623

624

## 625 **Animals**

626 Male C57BL/6J mice were acquired from Janvier Labs (Le Genest Saint Isle, France). Animals  
627 arrived at 5-8 weeks of age and were housed in a controlled environment (12 h light/dark cycle,  
628  $21 \pm 2$  °C, humidity  $50 \pm 10\%$ ). Stratification and randomization into individual diet groups were  
629 based on baseline body weight. Mice had *ad libitum* access to tap water and chow (2018 Teklad  
630 Rodent Diet, Envigo, Madison, WI, United States; Altromin 1324, Brogaarden, Hoersholm,  
631 Denmark). The study was approved by The Institutional Animal Care and Use Committee at  
632 MedImmune (Gaithersburg, MD, United States) and The Danish Animal Experiments  
633 Inspectorate (license: 2017-15-0201-01378) and performed in accordance with internationally  
634 accepted principles for the use of laboratory animals.

635

636

## 637 **Liver histology**

638 Terminal liver samples were dissected from the left lateral lobe immediately after sacrificing the  
639 animal and subsequently fixed overnight in 4% paraformaldehyde. The liver tissue was then  
640 paraffin-embedded and sectioned at a thickness of 3  $\mu\text{m}$ . Sections were stained with  
641 hematoxylin-eosin (HE, Dako, Glostrup, Denmark). Slides were scanned by ScanScope AT  
642 System (Aperio, Vista, CA, United States).

643

644

## 645 **Acknowledgements**

646 This research was supported by the Novo Nordisk Foundation Challenge Programme  
647 (#NNF17OC0027812), the Nordea Foundation (#02-2017-1749), the Neye Foundation, the  
648 Lundbeck Foundation (#R324-2019-1492), the Ministry of Higher Education and Science  
649 (#0238-00003B) and Insilico Medicine.

650

## 651 **Contributions**

652 I.H. wrote the article, developed and trained deep learning models, and analyzed data. M.B.E.  
653 analyzed clinical data. G.V.M. performed experiments on the base data set, astrocytes, and  
654 premature aging disease. J.S.M. developed Bayesian networks and advised the project. M.H.N. and  
655 D.O. performed animal experiments. L.M. managed clinical images and medical records. E.V.  
656 advised and edited the project. R.W. advised and edited the project. M.S.K. conceived the idea,  
657 supervised the project and edited the manuscript.

658

## 659 **Competing Interests**

660 All authors declare no competing interests.

661 **References**

662

- 663 1. Kirkland, J. L. & Tchkonina, T. Cellular Senescence: A Translational Perspective.  
664 *EBioMedicine* **21**, 21–28 (2017).
- 665 2. Zglinicki, T. von, Saretzki, G., Ladhoff, J., Fagagna, F. d’Adda di & Jackson, S. P. Human  
666 cell senescence as a DNA damage response. *Mech. Ageing Dev.* **126**, 111–117 (2005).
- 667 3. Covarrubias, A. J. *et al.* Senescent cells promote tissue NAD<sup>+</sup> decline during ageing via the  
668 activation of CD38<sup>+</sup> macrophages. *Nat. Metab.* **2**, 1265–1283 (2020).
- 669 4. Childs, B. G. *et al.* Senescent cells: an emerging target for diseases of ageing. *Nat. Rev.*  
670 *Drug Discov.* **16**, 718–735 (2017).
- 671 5. Schafer, M. J. *et al.* The senescence-associated secretome as an indicator of age and  
672 medical risk. *JCI Insight* **5**, e133668 (2020).
- 673 6. Young, A. R. J., Narita, M. & Narita, M. Cell Senescence as Both a Dynamic and a Static  
674 Phenotype. in *Cell Senescence* (eds. Galluzzi, L., Vitale, I., Kepp, O. & Kroemer, G.) vol.  
675 965 1–13 (Humana Press, 2013).
- 676 7. Basisty, N. *et al.* A proteomic atlas of senescence-associated secretomes for aging  
677 biomarker development. *PLOS Biol.* **18**, e3000599 (2020).
- 678 8. Matjusaitis, M., Chin, G., Sarnoski, E. A. & Stolzing, A. Biomarkers to identify and isolate  
679 senescent cells. *Ageing Res. Rev.* **29**, 1–12 (2016).
- 680 9. Lee, S. & Schmitt, C. A. The dynamic nature of senescence in cancer. *Nat. Cell Biol.* **21**,  
681 94–101 (2019).
- 682 10. Campisi, J. Cellular senescence: putting the paradoxes in perspective. *Curr. Opin. Genet.*  
683 *Dev.* **21**, 107–112 (2011).
- 684 11. Gorgoulis, V. *et al.* Cellular Senescence: Defining a Path Forward. *Cell* **179**, 813–827  
685 (2019).

- 686 12. Mitsui, Y. & Schneider, E. L. Increased nuclear sizes in senescent human diploid fibroblast  
687 cultures. *Exp. Cell Res.* **100**, 147–152 (1976).
- 688 13. Chen, J.-H. & Ozanne, S. E. Deep senescent human fibroblasts show diminished DNA  
689 damage foci but retain checkpoint capacity to oxidative stress. *FEBS Lett.* **580**, 6669–6673  
690 (2006).
- 691 14. Kusumoto, D. *et al.* Anti-senescent drug screening by deep learning-based morphology  
692 senescence scoring. *Nat. Commun.* **12**, 257 (2021).
- 693 15. Collado, M. & Serrano, M. Senescence in tumours: evidence from mice and humans. *Nat.*  
694 *Rev. Cancer* **10**, 51–57 (2010).
- 695 16. Campisi, J. CANCER: Suppressing Cancer: The Importance of Being Senescent. *Science*  
696 **309**, 886–887 (2005).
- 697 17. Goldman, R. D. *et al.* Accumulation of mutant lamin A causes progressive changes in  
698 nuclear architecture in Hutchinson–Gilford progeria syndrome. *Proc. Natl. Acad. Sci.* **101**,  
699 8963–8968 (2004).
- 700 18. Martins, F., Sousa, J., Pereira, C. D., Cruz e Silva, O. A. B. & Rebelo, S. Nuclear envelope  
701 dysfunction and its contribution to the aging process. *Aging Cell* **19**, (2020).
- 702 19. Kassani, S. H., Kassani, P. H., Wesolowski, M. J., Schneider, K. A. & Deters, R. Breast  
703 Cancer Diagnosis with Transfer Learning and Global Pooling. in *2019 International*  
704 *Conference on Information and Communication Technology Convergence (ICTC)* 519–524  
705 (IEEE, 2019). doi:10.1109/ICTC46691.2019.8939878.
- 706 20. Tomita, H. *et al.* Deep Learning for the Preoperative Diagnosis of Metastatic Cervical Lymph  
707 Nodes on Contrast-Enhanced Computed Tomography in Patients with Oral Squamous Cell  
708 Carcinoma. *Cancers* **13**, 600 (2021).
- 709 21. Gal, Y. & Ghahramani, Z. Dropout as a Bayesian Approximation: Representing Model  
710 Uncertainty in Deep Learning. *ArXiv150602142 Cs Stat* (2016).

- 711 22. Wen, Y., Vicol, P., Ba, J., Tran, D. & Grosse, R. Flipout: Efficient Pseudo-Independent  
712 Weight Perturbations on Mini-Batches. *ArXiv180304386 Cs Stat* (2018).
- 713 23. Fort, S., Hu, H. & Lakshminarayanan, B. Deep Ensembles: A Loss Landscape Perspective.  
714 *ArXiv191202757 Cs Stat* (2020).
- 715 24. Hewitt, G. *et al.* Telomeres are favoured targets of a persistent DNA damage response in  
716 ageing and stress-induced senescence. *Nat. Commun.* **3**, 708 (2012).
- 717 25. Hernandez-Segura, A., Nehme, J. & Demaria, M. Hallmarks of Cellular Senescence. *Trends*  
718 *Cell Biol.* **28**, 436–453 (2018).
- 719 26. Petr, M. A., Tulika, T., Carmona-Marin, L. M. & Scheibye-Knudsen, M. Protecting the Aging  
720 Genome. *Trends Cell Biol.* **30**, 117–132 (2020).
- 721 27. Keijzers, G., Bakula, D. & Scheibye-Knudsen, M. Monogenic Diseases of DNA Repair. *N.*  
722 *Engl. J. Med.* **377**, 1868–1876 (2017).
- 723 28. Idda, M. L. *et al.* Survey of senescent cell markers with age in human tissues. *Aging* **12**,  
724 4052–4066 (2020).
- 725 29. Collado, M., Blasco, M. A. & Serrano, M. Cellular Senescence in Cancer and Aging. *Cell*  
726 **130**, 223–233 (2007).
- 727 30. Liggett, W. H. & Sidransky, D. Role of the p16 tumor suppressor gene in cancer. *J. Clin.*  
728 *Oncol.* **16**, 1197–1206 (1998).
- 729 31. Campisi, J., Andersen, J. K., Kapahi, P. & Melov, S. Cellular senescence: A link between  
730 cancer and age-related degenerative disease? *Semin. Cancer Biol.* S1044579X11000502  
731 (2011) doi:10.1016/j.semcancer.2011.09.001.
- 732 32. Burd, C. E. *et al.* Monitoring Tumorigenesis and Senescence In Vivo with a p16INK4a-  
733 Luciferase Model. *Cell* **152**, 340–351 (2013).
- 734 33. Wang, B., Kohli, J. & Demaria, M. Senescent Cells in Cancer Therapy: Friends or Foes?  
735 *Trends Cancer* **6**, 838–857 (2020).

- 736 34. Pathak, R. U., Soujanya, M. & Mishra, R. K. Deterioration of nuclear morphology and  
737 architecture: A hallmark of senescence and aging. *Ageing Res. Rev.* **67**, 101264 (2021).
- 738 35. Filippi-Chiela, E. C. *et al.* Nuclear Morphometric Analysis (NMA): Screening of Senescence,  
739 Apoptosis and Nuclear Irregularities. *PLoS ONE* **7**, e42522 (2012).
- 740 36. Neri, F., Basisty, N., Desprez, P.-Y., Campisi, J. & Schilling, B. Quantitative Proteomic  
741 Analysis of the Senescence-Associated Secretory Phenotype by Data-Independent  
742 Acquisition. *Curr. Protoc.* **1**, e32 (2021).
- 743 37. Ronneberger, O., Fischer, P. & Brox, T. U-Net: Convolutional Networks for Biomedical  
744 Image Segmentation. in *Medical Image Computing and Computer-Assisted Intervention –*  
745 *MICCAI 2015* (eds. Navab, N., Hornegger, J., Wells, W. M. & Frangi, A. F.) vol. 9351 234–  
746 241 (Springer International Publishing, 2015).
- 747
- 748

749 **Figure legends**

750 **Figure 1 Nuclear morphology is an accurate senescence predictor *in vitro*.** **a** Analysis  
751 workflow. **b** Sample nuclei for controls, replicative senescence (RS) and ionizing radiation (IR)  
752 induced senescent cells. **c** Area of identified nuclei (n=6,976-68,971, mean  $\pm$  95% CI). **d**  
753 Convexity of identified nuclei (n= 6,976-68,971, mean  $\pm$  95% CI). **e** Aspect ratio of identified  
754 nuclei (n= 6,976-68,971, mean  $\pm$  95% CI). **f** Scatter plot of individual nuclei, with overall  
755 distributions for each to the top and right. **g** Accuracy of a deep neural network (DNN) predictor  
756 on validation data. **h** Receiver operating characteristics (ROC) curve of the DNN. **i**  
757 Precision/recall curve. **j** Predicted senescence probability of nuclei for independent cell lines (n=  
758 2,504-22,481, mean  $\pm$  95% CI). **k** Percent of nuclei in each state classified as senescent for  
759 independent cell lines. **l** Accuracy of DNNs trained and predicting after different normalization  
760 methods. **m** Correlation between morphological metrics and predicted senescence by class,  
761 BG: background.

762

763 **Figure 2 Predictions from deep ensembles.** **a** Heatmap of variation in predictions by  
764 members of ensemble (500 sample nuclei as rows, ensemble members as columns). Blue is  
765 young/control and white is senescent. **b** Heatmap of per-class accuracy for control and  
766 senescent by ensemble model. **c** Accuracy of deep ensemble. **d** ROC curve for the deep  
767 ensemble. **e** Accuracy of single model, Bayesian neural networks, deep ensemble, and  
768 bagging. **f** Accuracy of deep ensemble with normalized samples. **g** ROC curve for the deep  
769 ensemble with normalized samples. **h** Accuracy of three-state senescence ensemble model. **i**  
770 ROC curve for the type ensemble model. **j** Accuracy of RS-only model. **k** Accuracy of IR-only  
771 model.

772

773 **Figure 3 Senescence can be predicted across tissues and species.** **a** Number of  $\gamma$ H2AX  
774 foci by type of senescence (n=1,831-15,560, mean  $\pm$  95% CI). **b** Number of 53BP1 foci by type



775 of senescence (n= 1,831-15,560, mean  $\pm$  95% CI). **c** Correlation between foci count and  
776 predicted senescence. **d** Representative immunohistochemistry micrographs of premature  
777 aging nuclei with DNA damage foci staining. **e** Nuclear area for premature aging diseases  
778 (n=4,340-15074, mean  $\pm$  95% CI), HGPS: Hutchinson-Gilford Progeria Syndrome, AT: ataxia  
779 telangiectasia, CS: Cockayne Syndrom. **f** Number of gH2AX foci for premature aging diseases  
780 (n= 5,162-17,584, mean  $\pm$  95% CI). **g** Number of 53BP1 foci by premature aging diseases (n=  
781 5,162-17,584, mean  $\pm$  95% CI). **h** Predicted probability of senescence for premature aging  
782 disease (n=5,162-17,584, mean  $\pm$  95% CI). **i** Representative immunohistochemistry  
783 micrographs of senescent murine astrocytes with DNA damage foci staining. **j** Area of murine  
784 astrocytes (n=4,888-13,549, mean  $\pm$  95% CI). **k** Number of gH2AX foci for murine astrocytes  
785 (n=4,918-13,661, mean  $\pm$  95% CI). **l** Number of 53BP1 foci for murine astrocytes (n= 4,918-  
786 13,661, mean  $\pm$  95% CI). **m** Predicted senescence for murine astrocytes (n= 4,918-13,661,  
787 mean  $\pm$  95% CI). **n** Analysis workflow. **o** Mean nuclear area per mouse by age (n=5). **p** Mean  
788 nuclear convexity per mouse by age (n=5). **q** Mean nuclear aspect ratio per mouse by age  
789 (n=5). **r** Predicted percent that are RS senescent (n=5). **s** Predicted percent that are IR  
790 senescent (n=5).

791  
792 **Figure 4 Nuclear morphology predict senescence and cancer risk in humans.** **a** Analysis  
793 workflow. **b** Mean nuclear area per patient by age (n=148). **c** Mean nuclear convexity per  
794 patient by age (n=148). **d** Mean nuclear aspect ratio per patient by age (n=148). **e** Predicted  
795 percent that are RS senescent (n=169). **f** Predicted percent that are IR senescent (n=169). **g**  
796 Number of cases for most common cancer conditions. **h** Volcano plot of conditions based on IR  
797 senescence residuals and chi-square p-values. **i** Volcano plot of conditions based on RS  
798 senescence residuals and chi-square p-values. **j** Contingency table between neoplasms and  
799 residuals of predicted senescence. **k** Contingency table between malignant skin neoplasms and  
800 residuals of predicted senescence. **l** Contingency table between all malignant neoplasms and

801 residuals of predicted senescence. **m** Contingency table between malignant non-skin

802 neoplasms and residuals of predicted senescence.

803

804

Figure 1

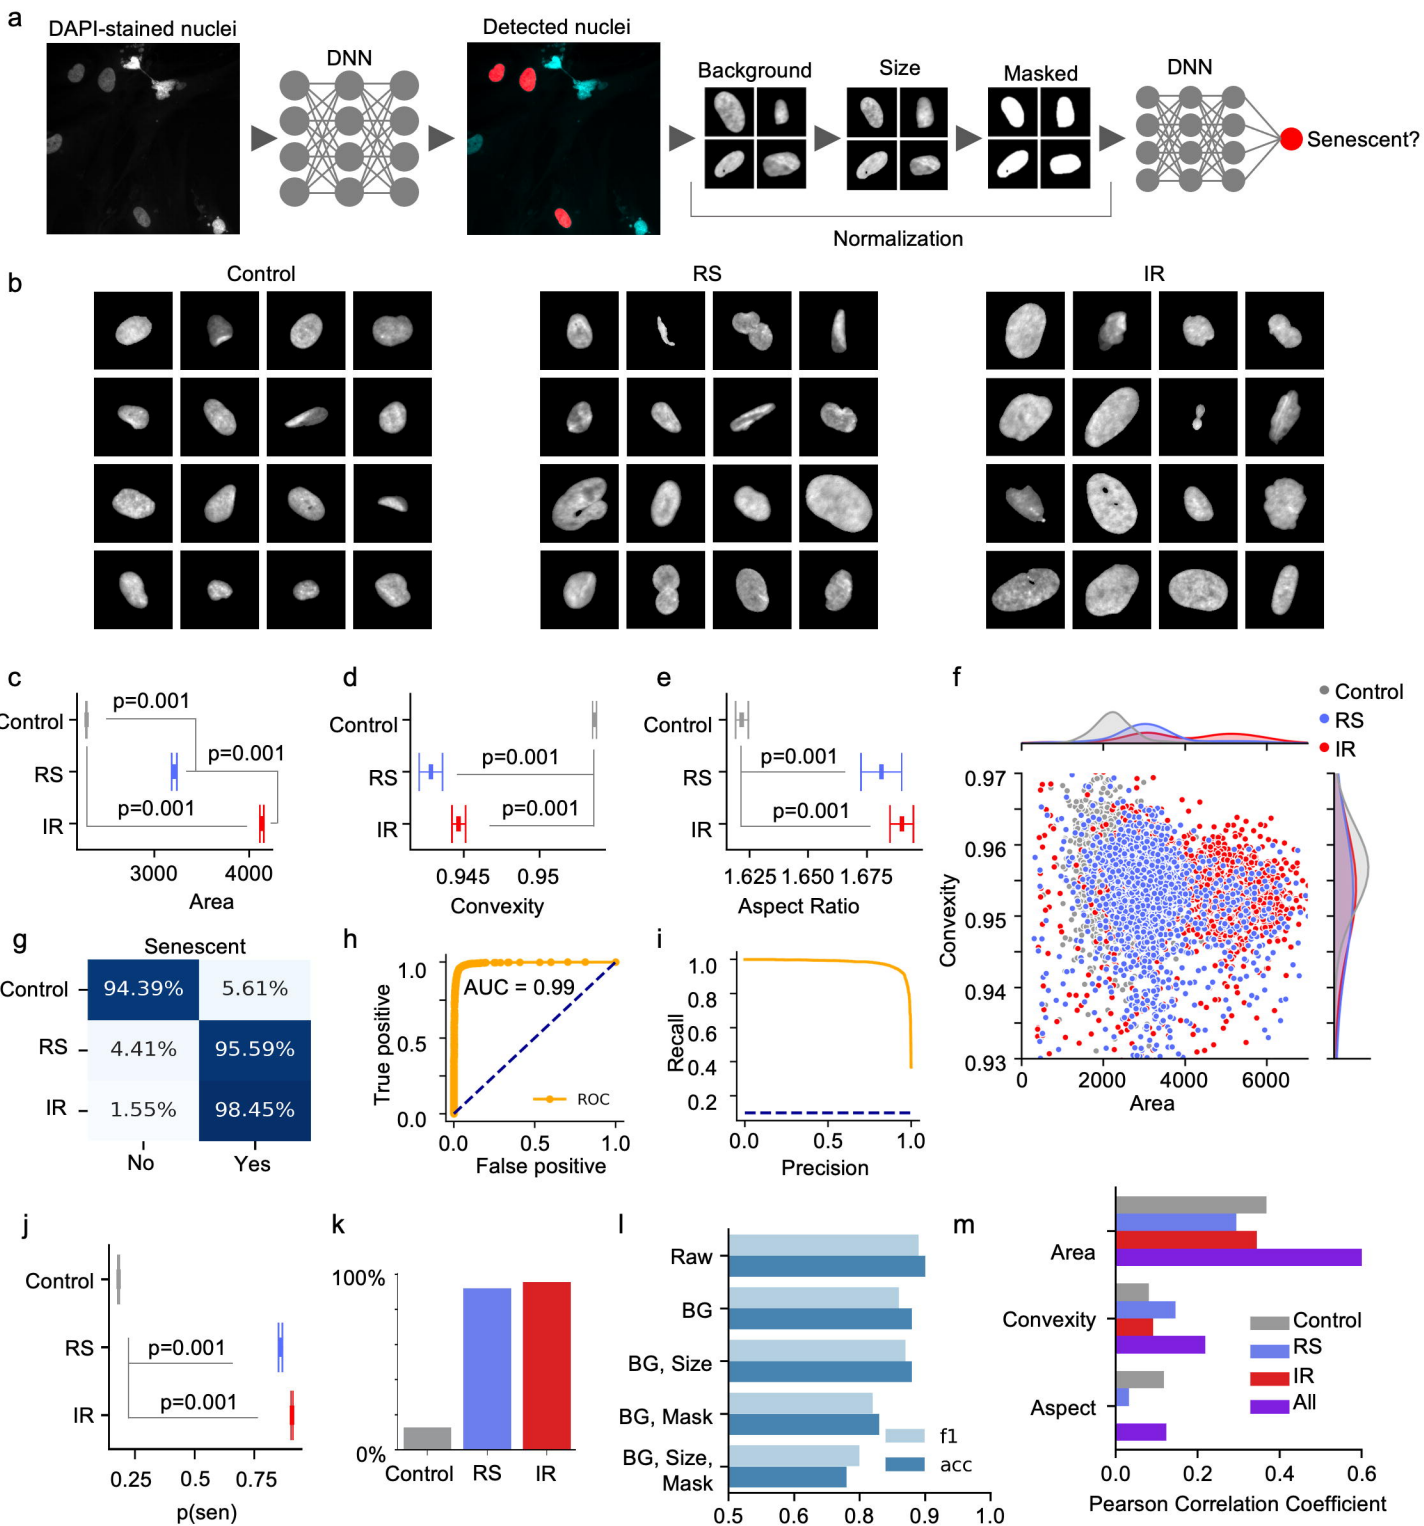

**Figure 2**

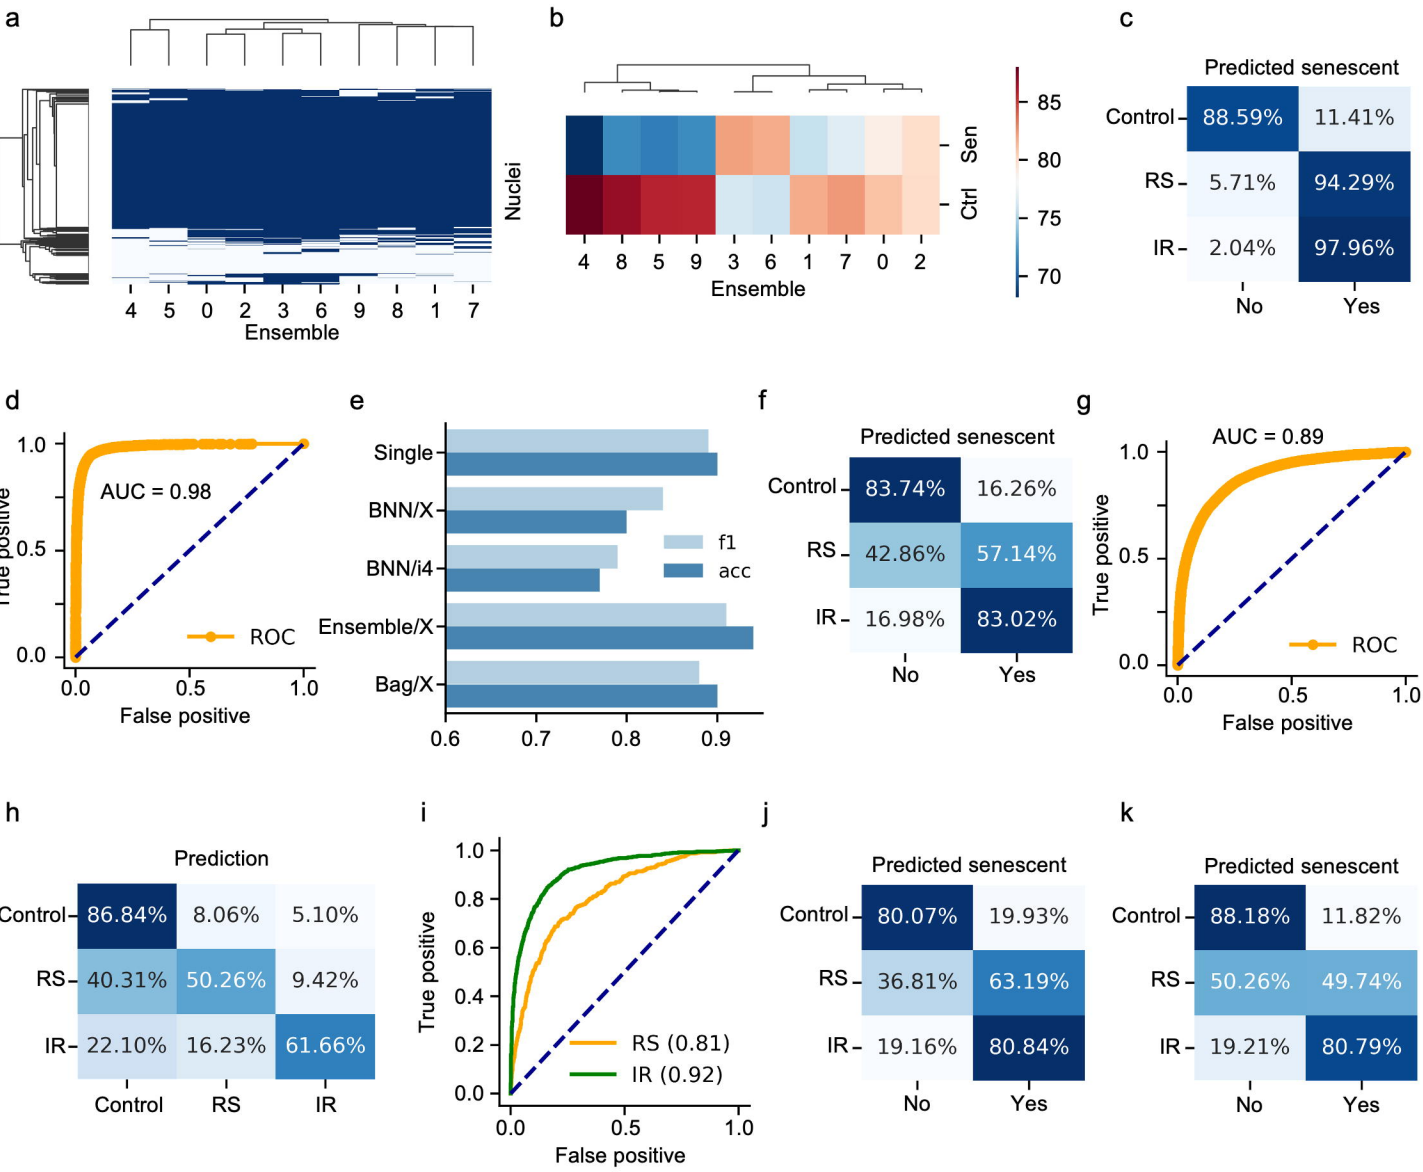

**Figure 3**

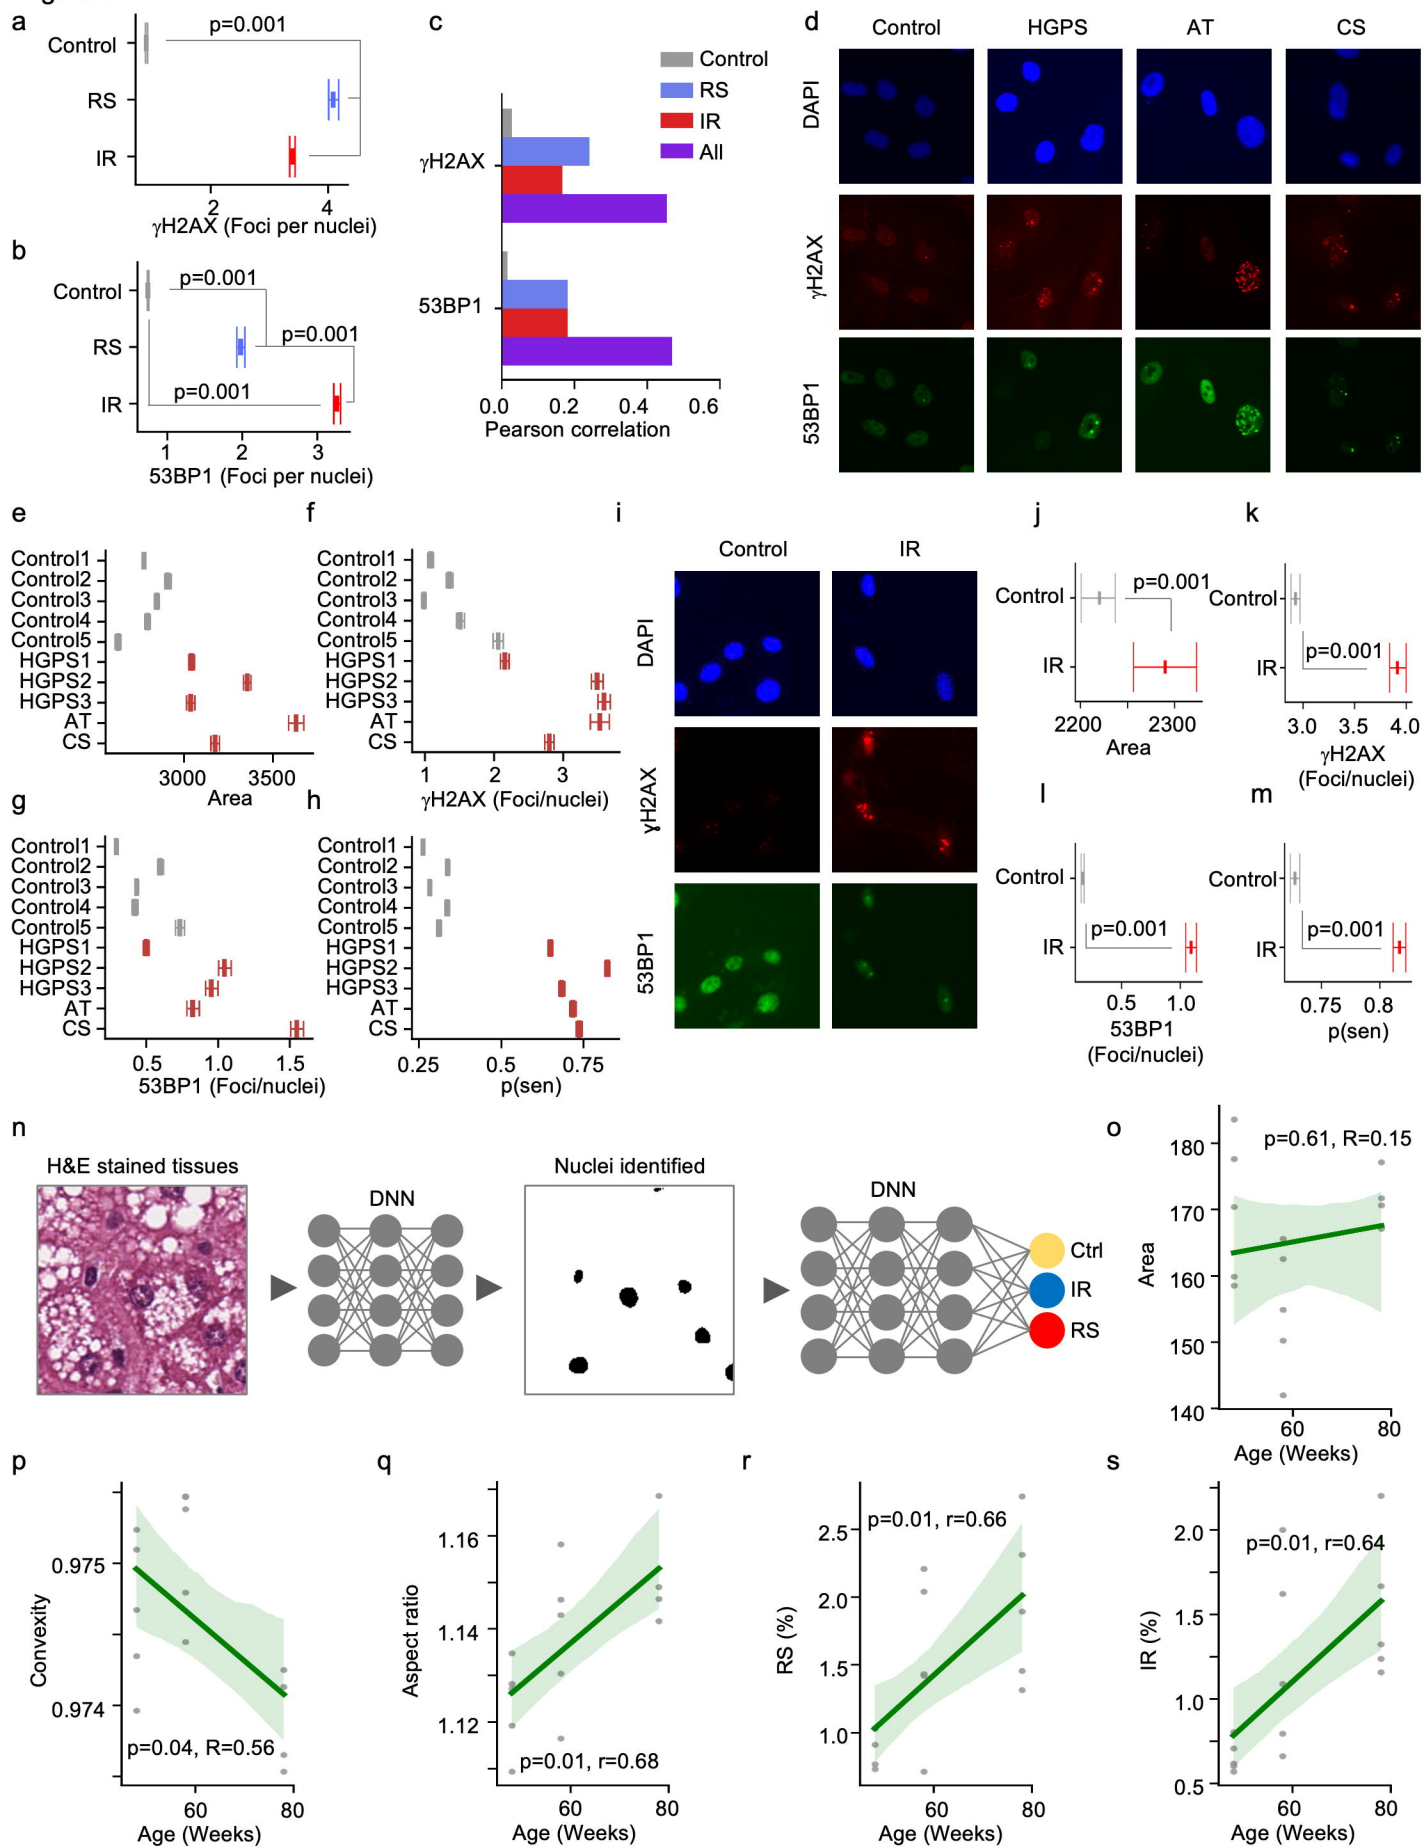

Figure 4

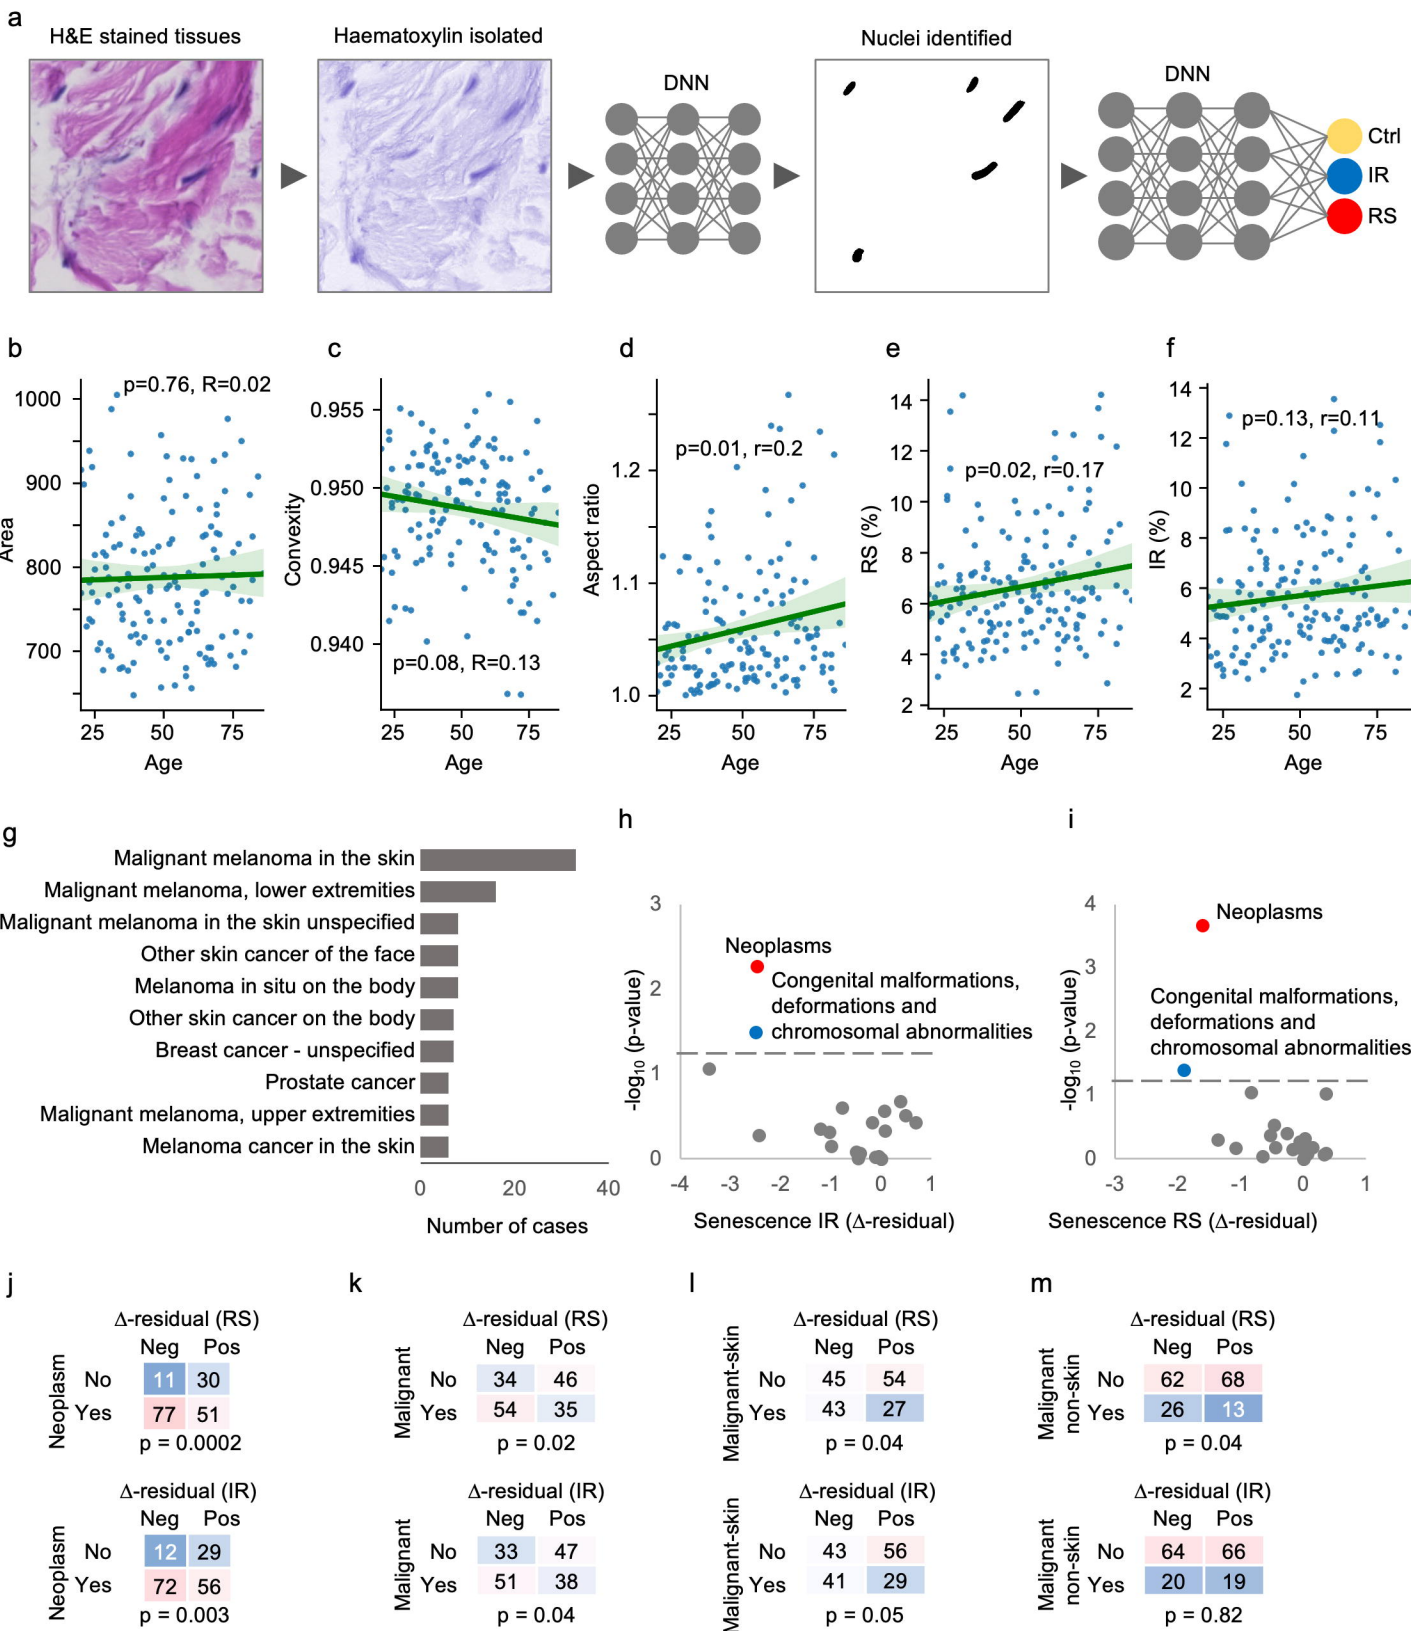

Source: https://biorxiv.org/content/10.1101/2021.03.18.435987v1.full.pdf
